# Supplementary material
Source: Springer Nature journal article supplement (https://www.springermedizin.de/resource/supplementary/12889_2010_3300_MOESM2_ESM.pdf/9488646)
Supplement: MOESM2 [file 9488646]

## MAIN DATA SOURCES FOR MODELS

2003 Burden of Disease

2004-05 National Health Survey

Australian average weekly earnings 2008 (ABS)

2008 Time Use Survey

Disease Costs & Impact Study 2000-01 (AIHW)

## HEALTH & ECONOMIC BENEFITS

Absolute change in health status (2008 Australian population)

## MODELS

Household and Leisure

Workforce production

Health sector

Reference committee feedback processes  
Multivariable uncertainty & one-way sensitivity analyses
